# Supplementary material
Source: PubMed Central journal article supplement (PMC7060821)
Supplement: NIHMS1557230-supplement-Supporting_Info__PDF_.pdf [file NIHMS1557230-supplement-Supporting_Info__PDF_.pdf]

## Supporting Information

### Quantitative Characterization of the Neuropeptide Level Changes in Dorsal Horn and Dorsal Root Ganglia Regions of the Murine Itch Models

Emily G. Tillmaand<sup>§,1</sup>, Krishna D. B. Anapindi<sup>§,1,2</sup>, Eduardo A. De La Toba<sup>1,2</sup>, Changxiong J. Guo<sup>4</sup>, Jessica Krebs<sup>3</sup>, Ashley E. Lenhart<sup>1</sup>, Qin Liu<sup>4</sup>, Jonathan V. Sweedler<sup>\*,1,2</sup>

<sup>§</sup>co-first authors

\*Corresponding author  
Email: [jsweedle@illinois.edu](mailto:jsweedle@illinois.edu)  
Tel: 217-244-7359

#### Table of Contents

**Figure S1.** Fold-change (M) vs. average (A) plots for the quantified peptides and box plots corresponding to all quantified peptides before and after normalization.

**Figure S2.** Plot of q-values for all the quantified peptides from the DH AEW model.

A. DRG AEW

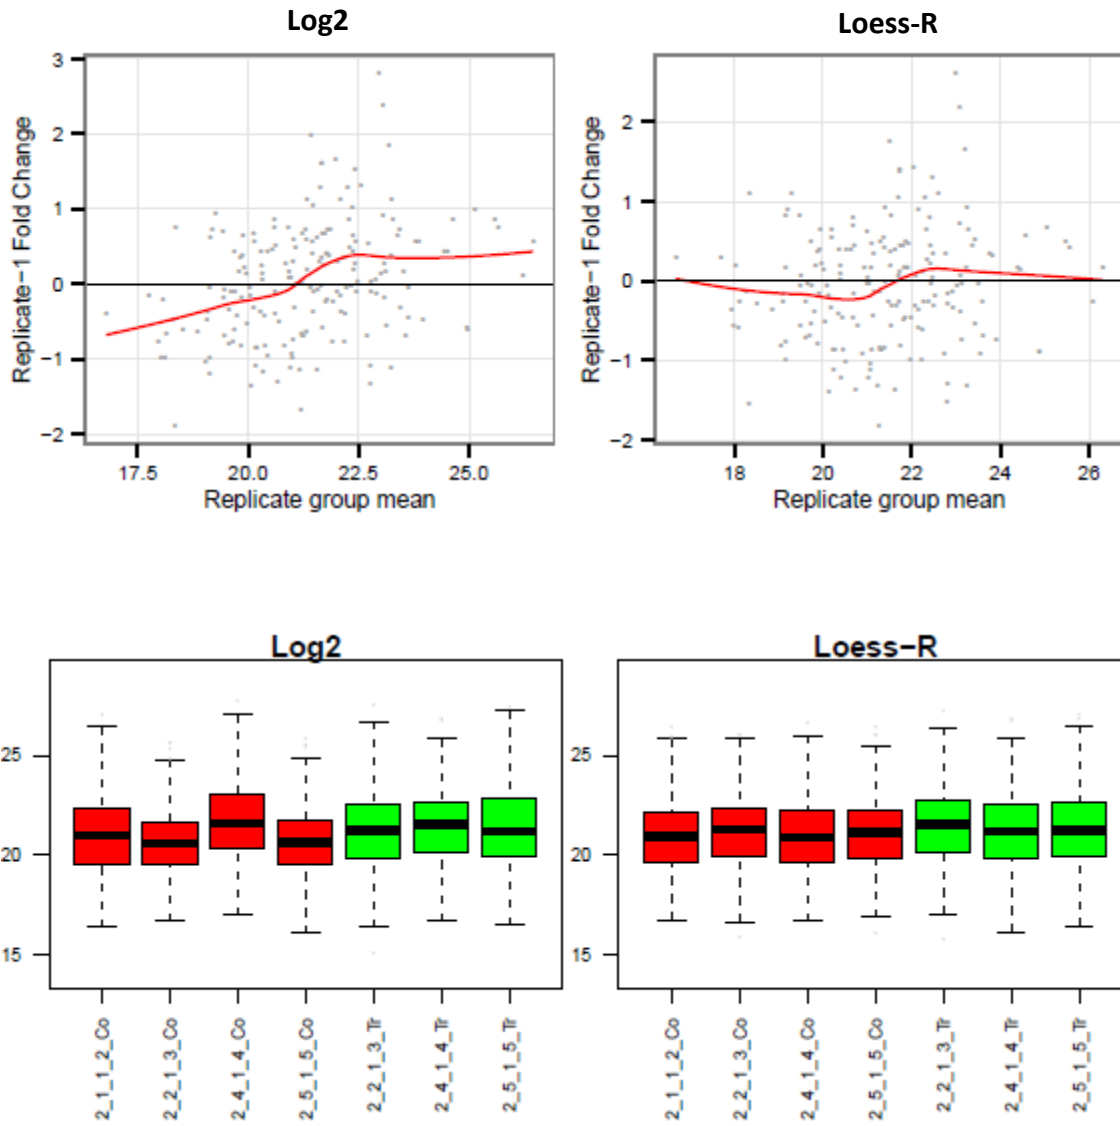

**B. DRG MC903**

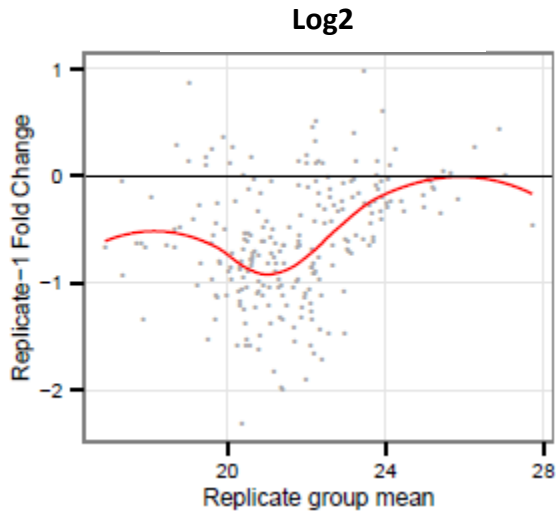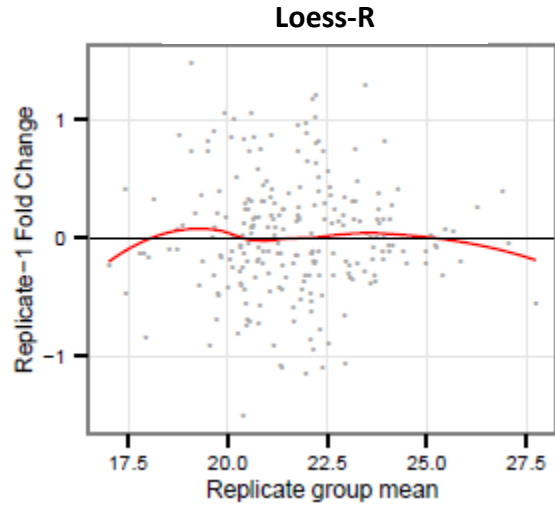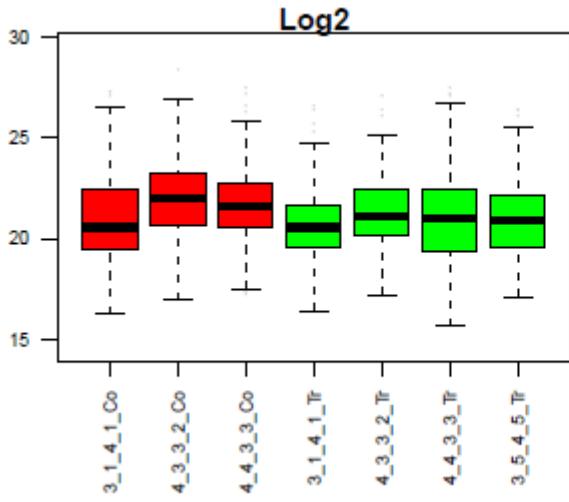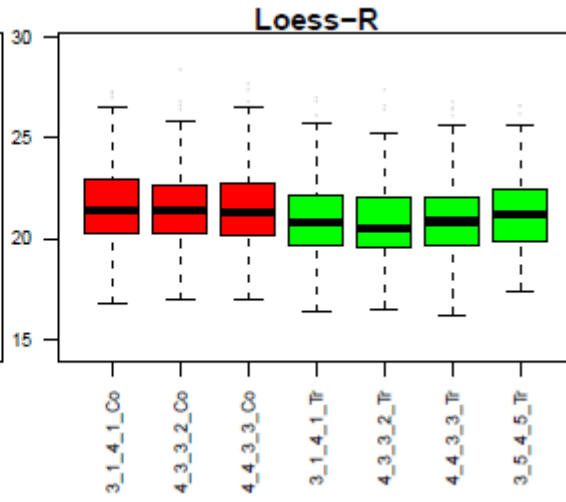

C. DH AEW

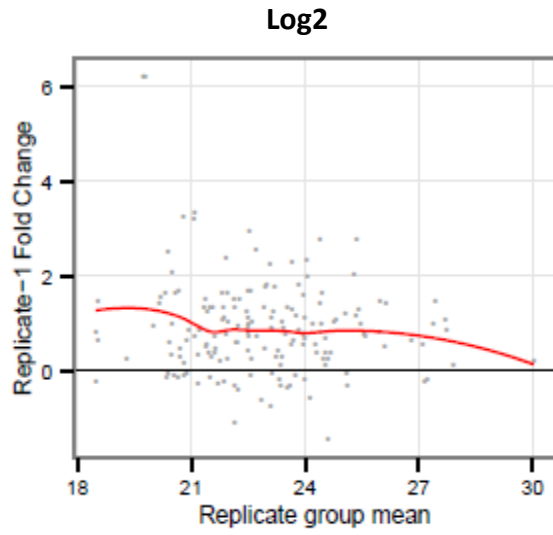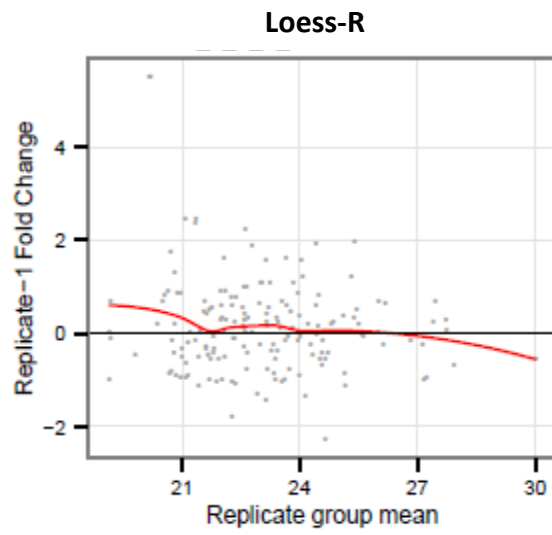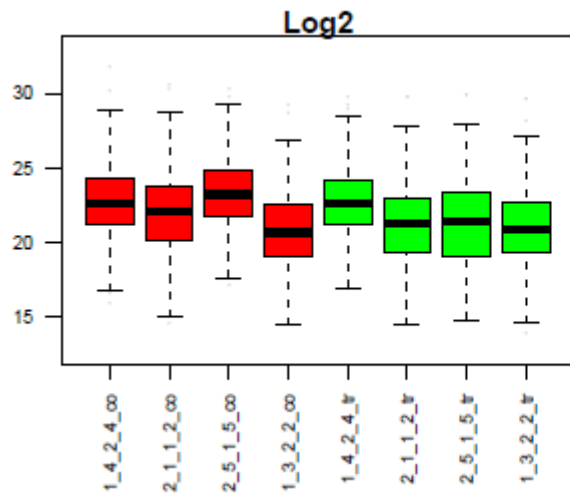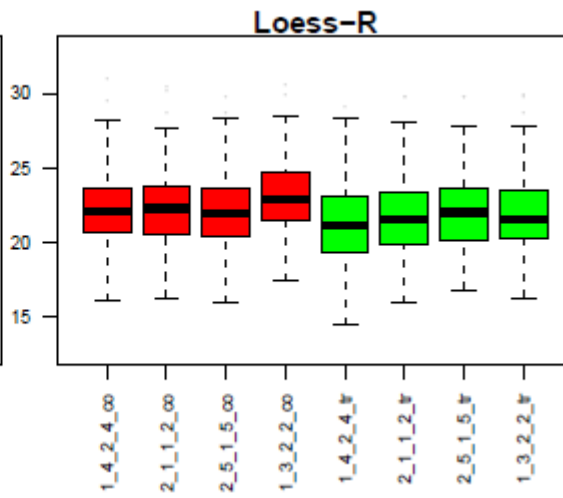

D. DH MC903

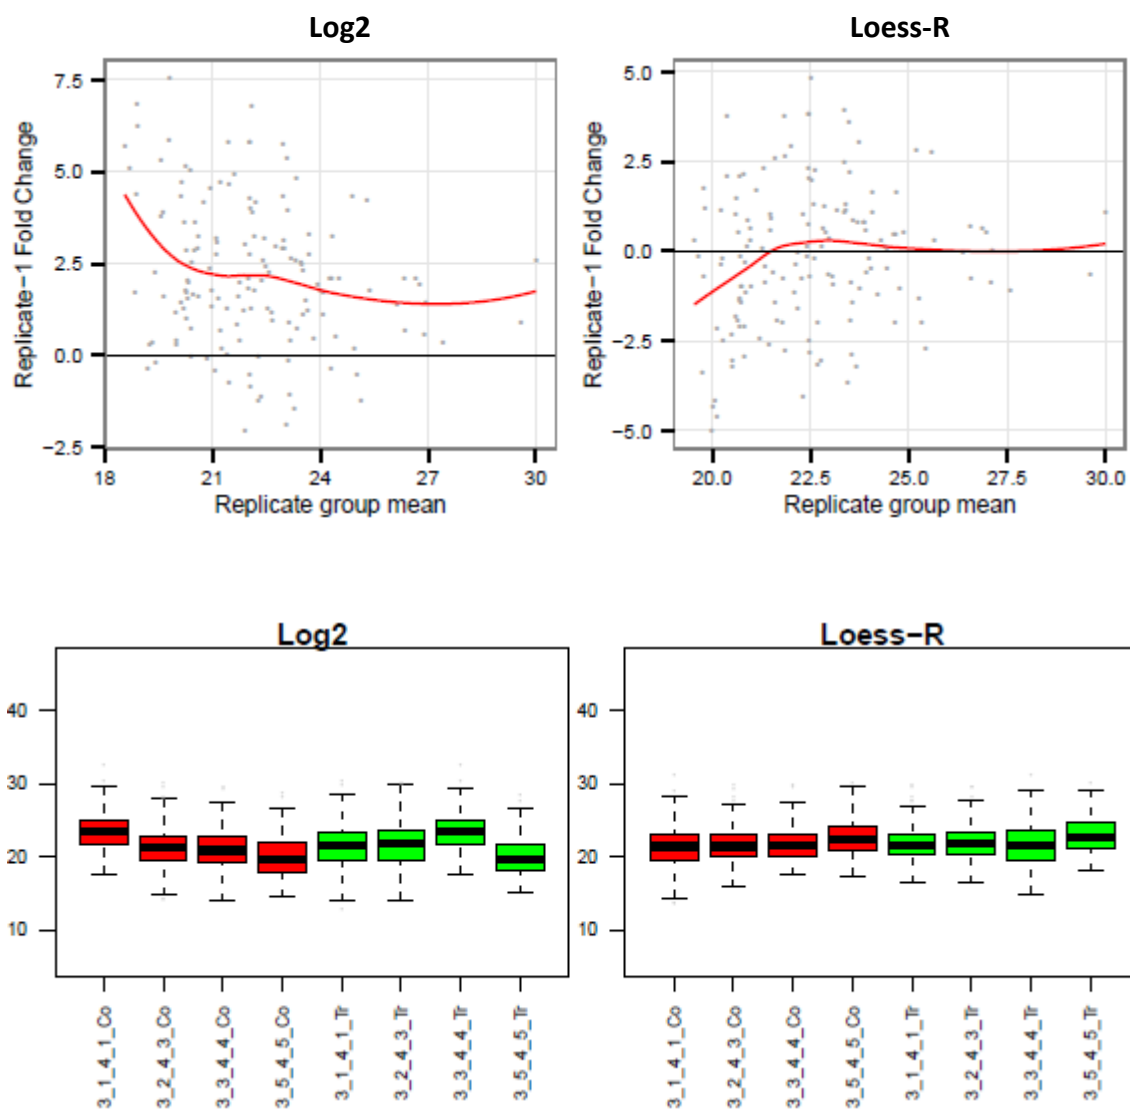

**Figure S1. A–D.** Fold-change (M) vs. average (A) plots for the quantified peptides and box plots corresponding to all quantified peptides before and after normalization. **Top rows:** MA plots where the y-axis represents the fold change (M) and the x-axis represents the group average (A). These plots illustrate the change introduced due to normalization via LOESS compared to un-normalized (Log2) peptide peak areas. Although each row depicts only 1 replicate, the two plots are representative of the whole sample. **Bottom rows:** Box plots that depict the first quartile, median, third quartile, and the interquartile range of the peptide quantitation data before and after normalization for all the replicates.

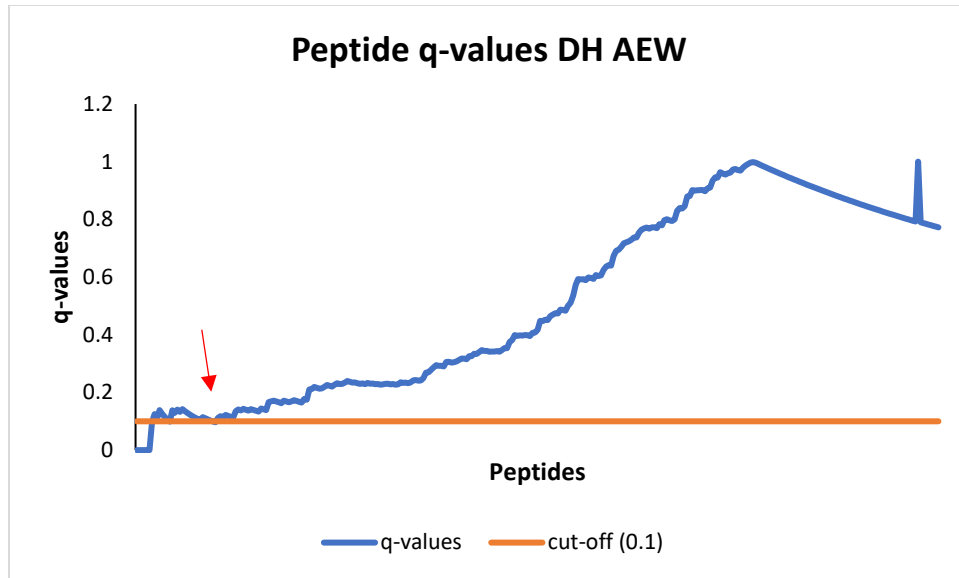

**Figure S2.** Due to the non-monotonic increase of q-values, we considered all of the peptides that fall under the farthest occurrence of  $q \leq 0.1$  (i.e., to the left of the red arrow).
